# Supplementary material for: A systematic review of the effects of intimate partner violence on HIV-positive pregnant women in sub-Saharan Africa
Source: Springer Nature journal article supplement (doi:10.1186/s12889-022-12619-w), 2022-02-03
Supplement: MOESM2 [file 20097972]

## PubMed

"intimate partner violence"[tiab] OR IPV [tiab] OR "intimate-partner violence"[tiab] OR "intimate partner abuse"[tiab] OR "domestic abuse"[tiab] OR "domestic violence"[tiab] OR "domestic assault"[tiab] OR "partner violence"[tiab] OR "Intimate Partner Violence"[Mesh]

**AND**

"pregna\*" [tiab] OR "matern\*" [tiab] OR "mother" [tiab] OR "primigravida" [tiab] OR "Pregnancy" [Mesh]

**AND**

"HIV" [tiab] OR "AIDS" [tiab] OR "human immunodeficiency virus" [tiab] OR "acquired immune deficiency syndrome" [tiab] OR "HIV"[Mesh]

## Web of Science

intimate partner violence OR IPV OR intimate-partner violence OR intimate partner abuse OR domestic abuse OR domestic violence OR domestic assault OR partner violence

**AND**

pregna\* OR matern\* OR mother OR primigravida

**AND**

HIV OR AIDS OR human immunodeficiency virus OR acquired immune deficiency syndrome

## African Journals Online

"intimate partner violence" **AND** pregnancy **AND** HIV

**Supplementary Material 2.** Search strategy for each database (PubMed, Web of Science and African Journals Online) using key words and MESH terms.
